# Supplementary material for: Nucleolar dynamics and interactions with nucleoplasm in living cells
Source: eLife. 2019 Nov 26;8:e47533. doi: 10.7554/eLife.47533 (PMC6879204; doi:10.7554/eLife.47533)
Supplement: Table 1—source data 1. [file elife-47533-table1-data1.xlsx]

## Sheet: Sheet1
	NNUC	NCells
Control	648	208
ATP-Depletion	345	127
Blebbistatin	399	127
Latrunculin-A	307	104
Nocodazole	310	106
α-Amanitin	268	95
Flavopiridol	309	105
Trichostatin A	278	95
Cyclohex I	291	91
Cyclohex II	294	105
Mean
	AN/ANUC	e	α	de	fneg	Nneg
Control	0.0515541	1.29781	46.9994	0.0763026	0.0333224	0.662037
ATP-Depletion	0.054114	1.2896	48.1382	0.0815451	0.0381917	0.817391
Blebbistatin	0.0519048	1.28549	46.3406	0.0760801	0.0356561	0.721805
Latrunculin-A	0.0609126	1.30665	47.1354	0.0709666	0.0300713	0.560261
Nocodazole	0.0516032	1.28082	49.6384	0.0742629	0.0318634	0.670968
α-Amanitin	0.0599727	1.33517	43.6837	0.073848	0.0455126	0.988806
Flavopiridol	0.052304	1.33678	43.4665	0.0739343	0.0478424	0.92233
Trichostatin A	0.0438736	1.29483	43.1244	0.0728818	0.0254542	0.52518
Cyclohex I	0.0527871	1.32173	46.1133	0.0764707	0.0377747	0.756014
Cyclohex II	0.0516085	1.35186	47.0402	0.0738877	0.0398758	0.744898
Standard Deviation
	AN/ANUC	e	α	de	fneg	Nneg
Control	0.0404417	0.321429	26.2175	0.0285997	0.0656813	1.37148
ATP-Depletion	0.0422628	0.276107	25.8585	0.0281272	0.0639011	1.39089
Blebbistatin	0.0409949	0.281094	25.9147	0.0277268	0.0670502	1.37833
Latrunculin-A	0.0443759	0.359739	25.4897	0.0277201	0.0632337	1.20949
Nocodazole	0.0370364	0.25413	27.6466	0.028873	0.0605044	1.38232
α-Amanitin	0.0470445	0.292884	27.0824	0.028507	0.0717371	1.70806
Flavopiridol	0.0400818	0.335014	27.0756	0.0275027	0.0802157	1.67306
Trichostatin A	0.0317092	0.362128	27.6392	0.0264513	0.0632309	1.34798
Cyclohex I	0.037214	0.287646	25.5064	0.024795	0.06922	1.48519
Cyclohex II	0.03864	0.381033	25.3744	0.0292874	0.0672733	1.32946
p-value
	AN/ANUC	e	α	de	fneg	Nneg
ATP-Depletion	0.359127	0.674113	0.51327	0.00877369	0.257888	0.0926234
Blebbistatin	0.893469	0.515023	0.693553	0.910558	0.581638	0.494981
Latrunculin-A	0.00210814	0.714166	0.939937	0.0110619	0.463949	0.24553
Nocodazole	0.985406	0.37591	0.168935	0.334974	0.734341	0.925306
α-Amanitin	0.0108687	0.0886234	0.0903503	0.280158	0.0169186	0.00563512
Flavopiridol	0.789238	0.0888583	0.0594078	0.27193	0.0058129	0.0176794
Trichostatin A	0.00227275	0.905567	0.0506298	0.0988143	0.0868467	0.159518
Cyclohex I	0.654418	0.256688	0.632846	0.932033	0.354914	0.35911
Cyclohex II	0.984381	0.0350079	0.982047	0.283714	0.163399	0.380518
Relative difference [%]
	AN/ANUC	e	α	de	fneg	Nneg
ATP-Depletion	3.84615	-0.769231	2.12766	7.89474	15.1515	24.2424
Blebbistatin	0	-0.769231	-2.12766	0	9.09091	9.09091
Latrunculin-A	17.3077	0.769231	0	-6.57895	-9.09091	-15.1515
Nocodazole	0	-1.53846	6.38298	-2.63158	-3.0303	1.51515
α-Amanitin	15.3846	3.07692	-6.38298	-2.63158	39.3939	50
Flavopiridol	0	3.07692	-8.51064	-2.63158	45.4545	39.3939
Trichostatin A	-15.3846	-0.769231	-8.51064	-3.94737	-24.2424	-19.697
Cyclohex I	1.92308	1.53846	-2.12766	0	15.1515	15.1515
Cyclohex II	0	3.84615	0	-2.63158	21.2121	12.1212
Kullback-Leibler Divergence (with respect to control)
	AN/ANUC	e	α	de	fneg	Nneg
ATP-Depletion	0.0256638	0.0111141	0.0211663	0.0315588	0.0514026	0.0176115
Blebbistatin	0.023363	0.0251832	0.0308006	0.035647	0.021724	0.00742451
Latrunculin-A	0.0590521	0.0292109	0.0279953	0.0399943	0.0500153	0.0154049
Nocodazole	0.0223023	0.0138574	0.042037	0.0247041	0.032601	0.00979436
α-Amanitin	0.0602282	0.0434536	0.0573723	0.0320771	0.0618808	0.0360059
Flavopiridol	0.0383351	0.0268939	0.0439743	0.0350419	0.0529354	0.0206417
Trichostatin A	0.0558498	0.0456756	0.0620496	0.0589422	0.0474183	0.0343663
Cyclohex I	0.0414146	0.0322391	0.0432886	0.0507893	0.042639	0.0146275
Cyclohex II	0.0134387	0.0259123	0.048564	0.0205401	0.0396858	0.0137214
Skew
	AN/ANUC	e	α	de	fneg	Nneg
Control	1.1	3.07	-0.09	-0.04	2.17	2.68
ATP-Depletion	1.01	2.23	-0.19	-0.16	1.8	1.87
Blebbistatin	1.31	2.26	-0.11	0.03	2	2.14
Latrunculin-A	0.79	3.01	-0.15	-0.07	2.06	2.36
Nocodazole	0.87	1.84	-0.28	0.07	1.9	2.55
α-Amanitin	0.98	1.95	0.08	0.08	1.61	2.26
Flavopiridol	1.28	2.36	0.03	-0.02	1.62	2.09
Trichostatin A	0.85	3.15	0.17	-0.25	2.95	3.15
Cyclohex I	1.13	2.13	-0.08	-0.12	1.98	2.7
Cyclohex II	0.98	4.19	-0.08	0.01	1.66	2.14
